# Supplementary material for: Functionalization of side chain terminals with fused aromatic rings in carbazole–diketopyrrolopyrrole based conjugated polymers for improved charge transport properties
Source: Royal Society of Chemistry journal article supplement (doi:10.1039/c6ra19914c), 2016-01-01
Supplement: c6ra19914c1.pdf [file c6ra19914c1.pdf]

**Functionalization of Side Chain Terminal with Fused Aromatic  
Ring in Carbazole-Diketopyrrolopyrrole Based Conjugated  
Polymer for Improved Charge Transport Property**

Ying Sun, Qizan Huang, Xueqin Zhang, Xiaojing Ding, Pei Han, Baoping Lin\*, Hong  
Yang, Lingxiang Guo

School of Chemistry and Chemical Engineering, Southeast University, Jiangning  
District, Nanjing 211189, Jiangsu Province, P.R. China.

Fax: 86-25-52090616; Tel: 86-25-52090616; E-mail: [lbp@seu.edu.cn](mailto:lbp@seu.edu.cn)

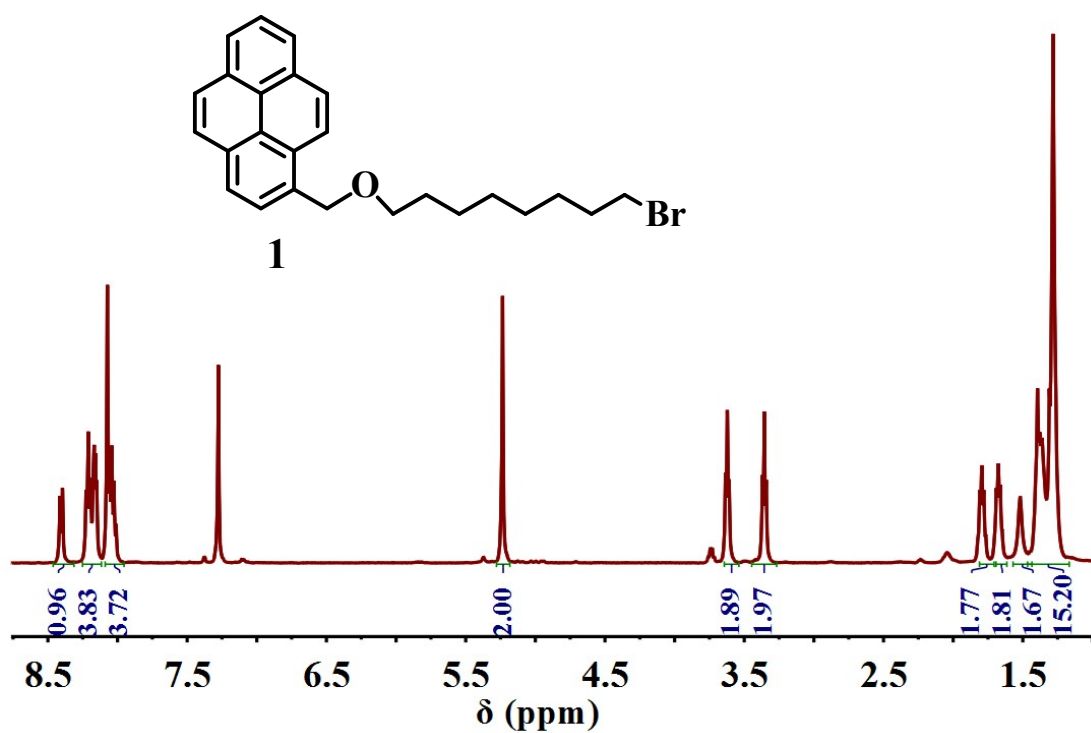

Figure. S1 <sup>1</sup>H NMR spectrum of compound 1 in CDCl<sub>3</sub>

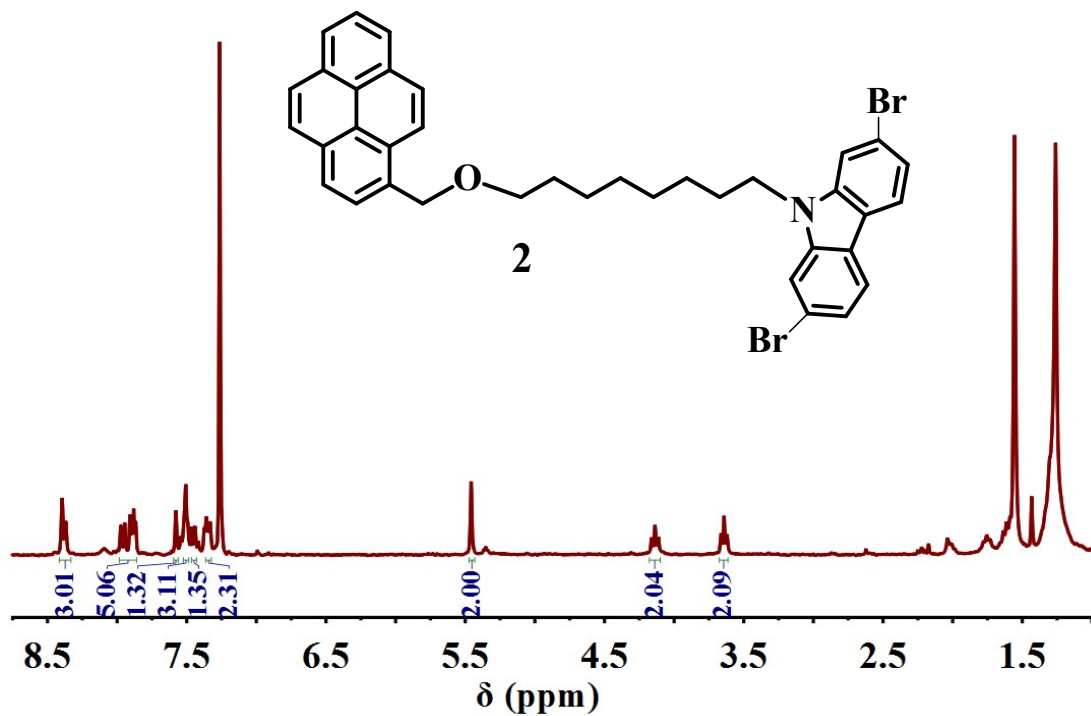

Figure. S2 <sup>1</sup>H NMR spectrum of compound 2 in CDCl<sub>3</sub>

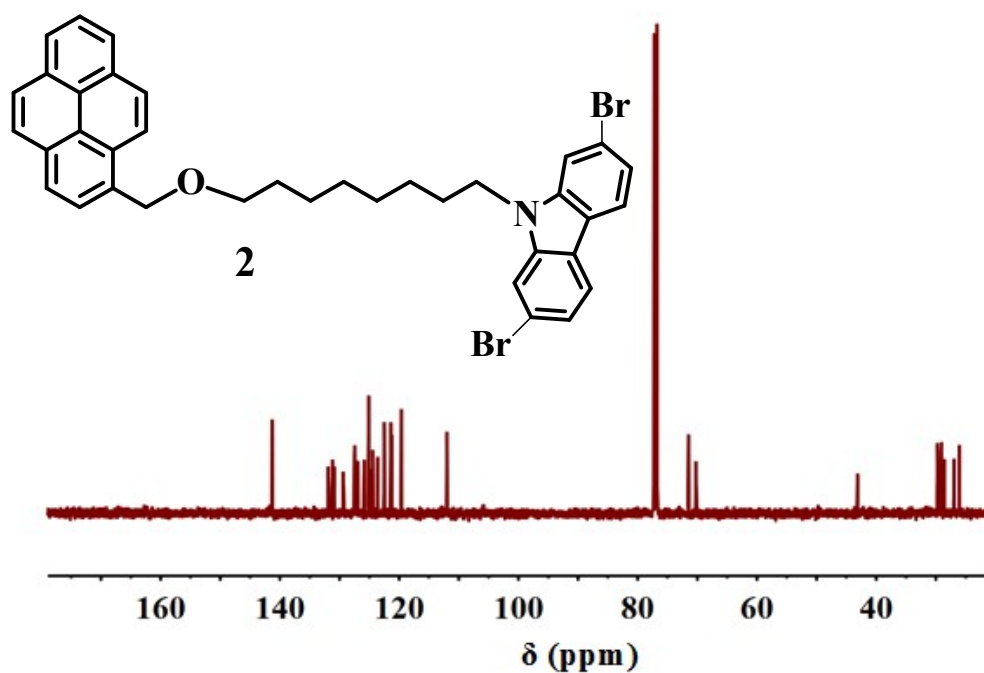

Figure. S3  $^{13}\text{C}$  NMR spectrum of **compound 2** in  $\text{CDCl}_3$

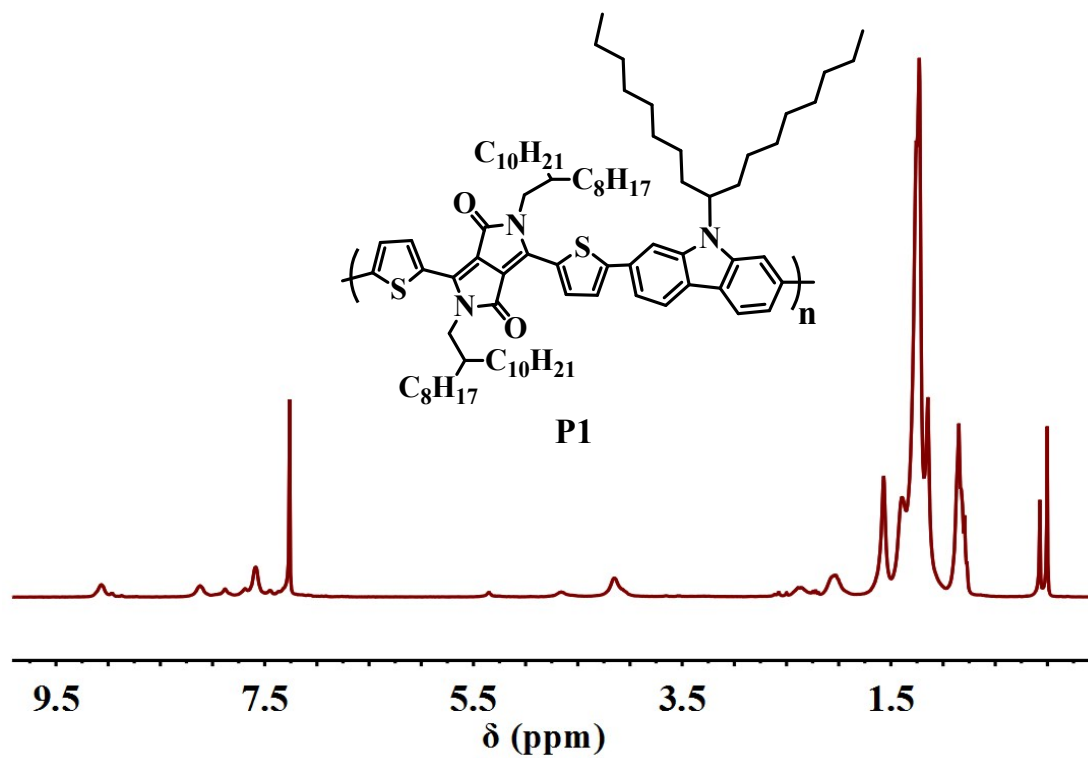

Figure. S4  $^1\text{H}$  NMR spectrum of **polymer P1** in  $\text{CDCl}_3$

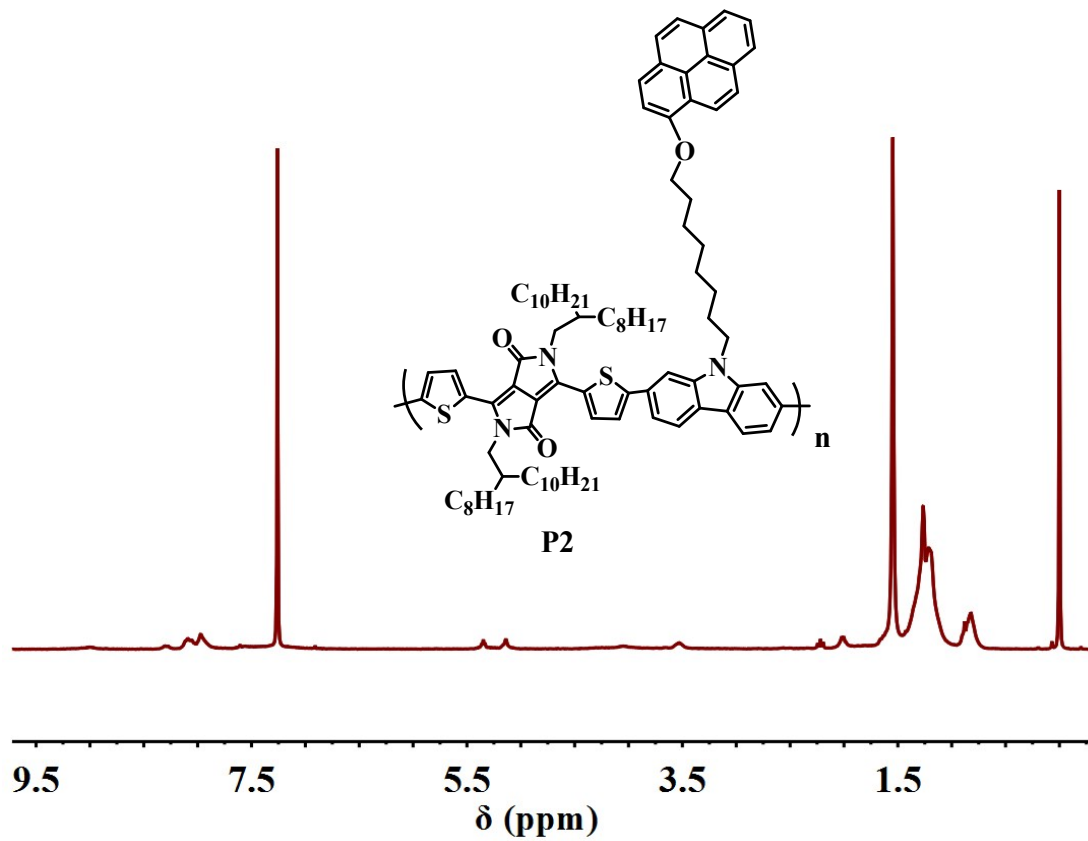

Figure. S5  $^1\text{H}$  NMR spectrum of **polymer P2** in  $\text{CDCl}_3$

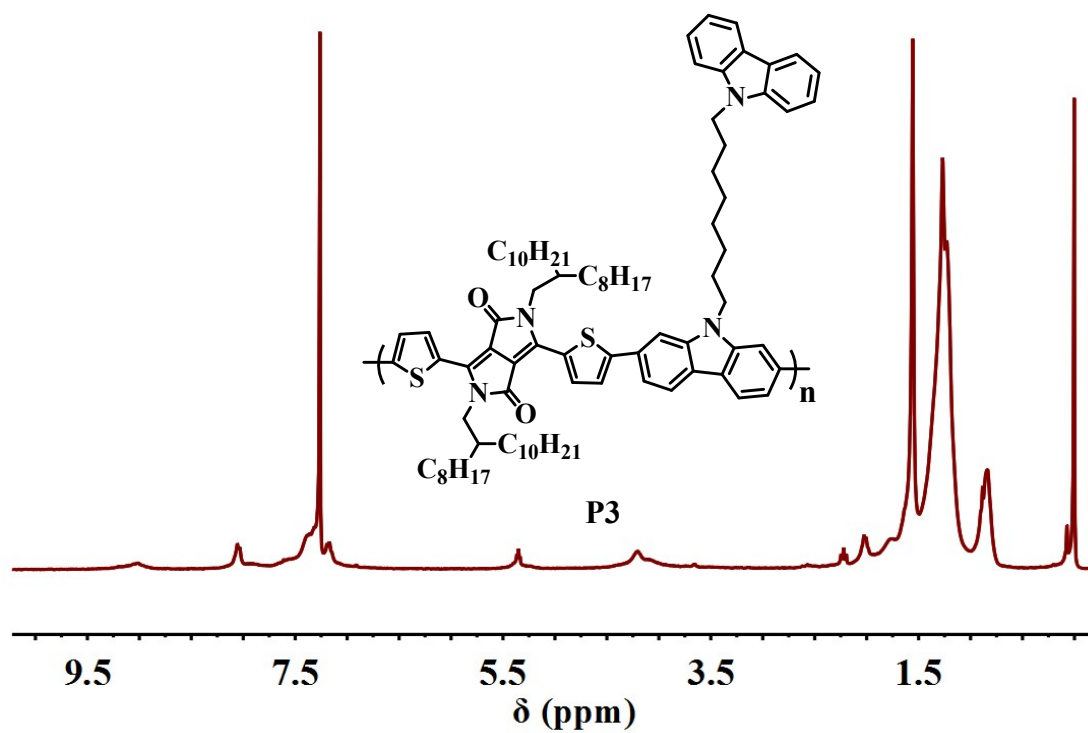

Figure. S6  $^1\text{H}$  NMR spectrum of **polymer P3** in  $\text{CDCl}_3$

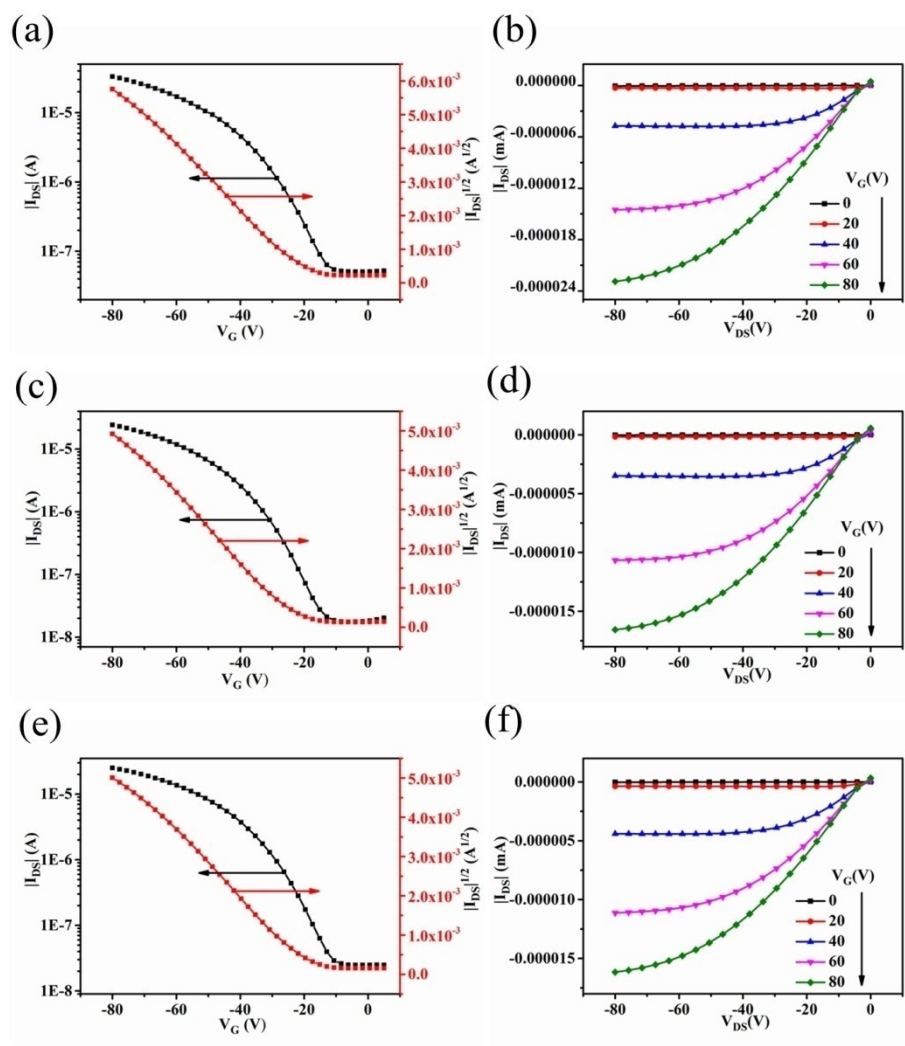

**Figure S7.** Transfer(left) and output(right) characteristics of OFET devices based on **polymer P1** under annealing temperature 120°C (a, b), 180°C (c, d), and 210°C(e, f)

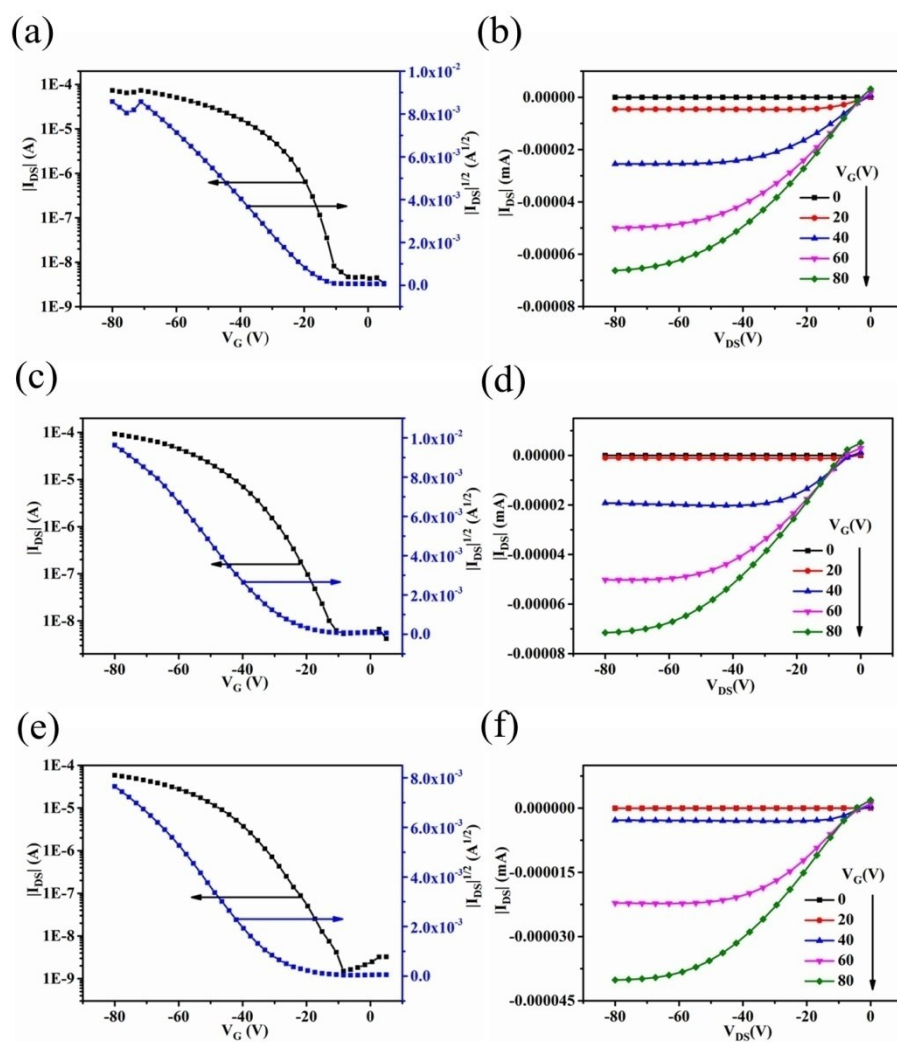

**Figure S8.** Transfer(left) and output(right) characteristics of OFET devices based on **polymer P2** under annealing temperature 120°C (a, b), 150°C (c, d), and 210°C(e, f)

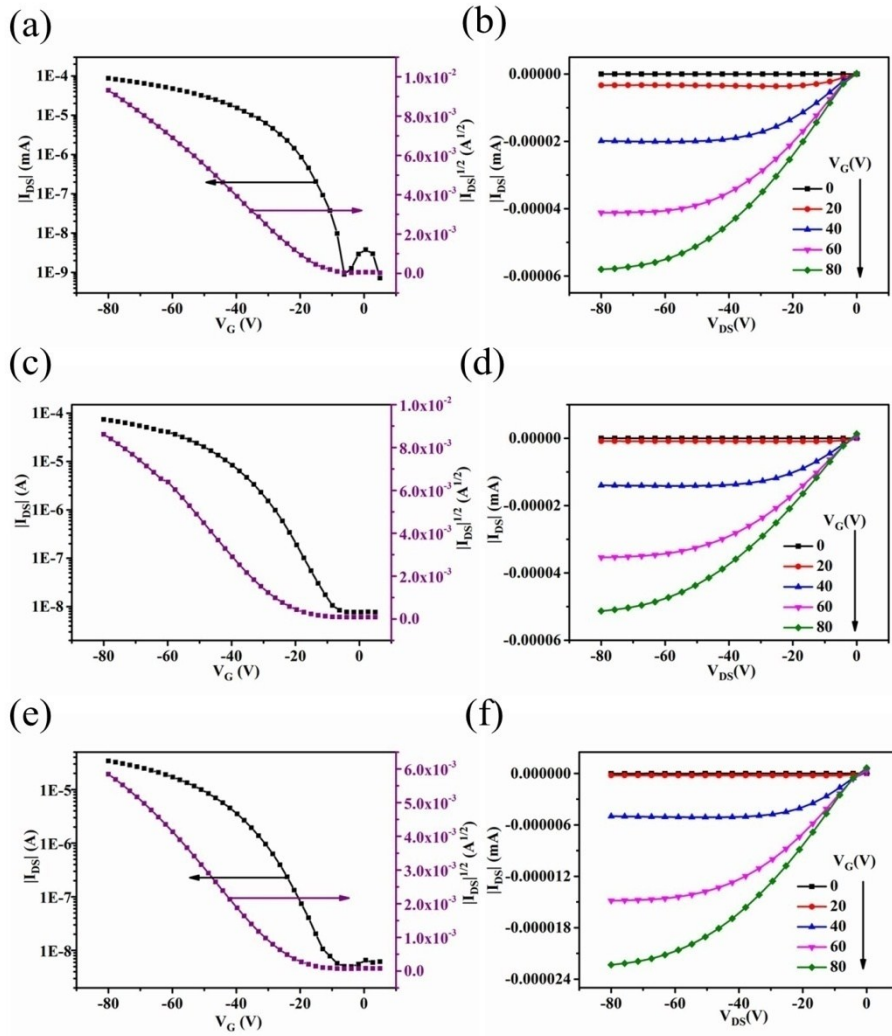

**Figure S9.** Transfer(left) and output(right) characteristics of OFET devices based on **polymer P3** under annealing temperature 120°C (a, b), 150°C (c, d), and 210°C(e, f)
